# Supplementary material
Source: PubMed Central journal article supplement (PMC7935766)
Supplement: NIHMS1648039-supplement-2.pdf [file NIHMS1648039-supplement-2.pdf]

**Figure S1 Related to Table 1**

**A**

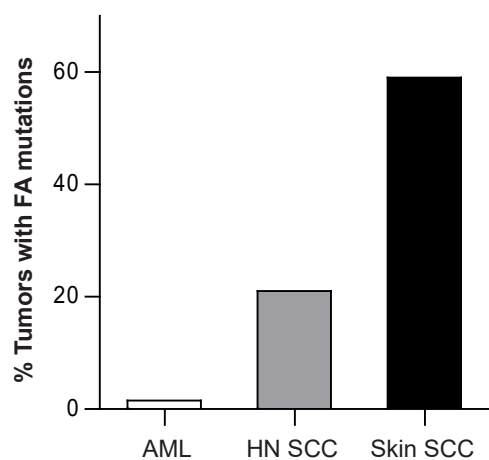

**B**

| Gene         | Mutations |        |          |
|--------------|-----------|--------|----------|
|              | AML       | HN SCC | Skin SCC |
| FANCA        | 0%        | 1.1%   | 24%      |
| FANCB        | 0%        | 1.1%   | 3%       |
| FANCC        | 0.5%      | 0.7%   | 3%       |
| FANCD1/BRCA2 | 0%        | 4%     | 34%      |
| FANCD2       | 0%        | 1.1%   | 10%      |
| FANCE        | 0%        | 0%     | 3%       |
| FANCF        | 0%        | 0%     | 3%       |
| FANCG        | 0%        | 0.7%   | 3%       |
| FANCI        | 0.5%      | 1.1%   | 7%       |
| FANCI/BRIP1  | 0%        | 1.8%   | 3%       |
| FANCL        | 0%        | 0.4%   | 3%       |
| FANCM        | 0.5%      | 1.1%   | 3%       |
| FANCN/PALB2  | 0%        | 1.4%   | 7%       |
| FANCO/RAD51C | 0%        | 0.7%   | 0%       |
| FANCP/SLX4   | 0%        | 1.8%   | 0%       |
| FANCQ/ERCC4  | 0%        | 1.4%   | 7%       |
| FANCR/RAD51  | 0%        | 0.4%   | 0%       |
| FANCS/BRCA1  | 0%        | 2.9%   | 10%      |
| FANCT/UBE2T  | 0%        | 0%     | 0%       |
| FANCU/XRCC2  | 0%        | 0%     | 0%       |
| FANCV/MAD2L2 | 0%        | 0.7%   | 0%       |
| FANCW/RFWD3  | 0%        | 1.1%   | 0%       |



Figure S2 Related to Figure 1

**A**

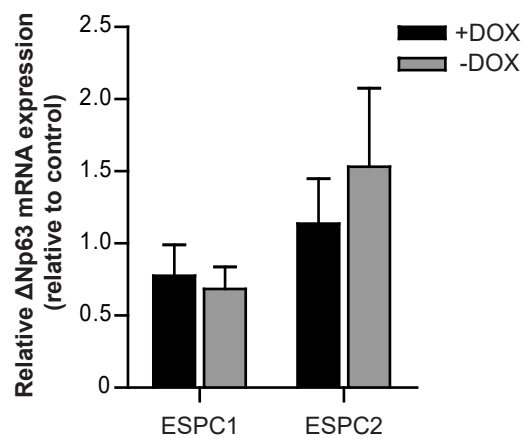

**B**

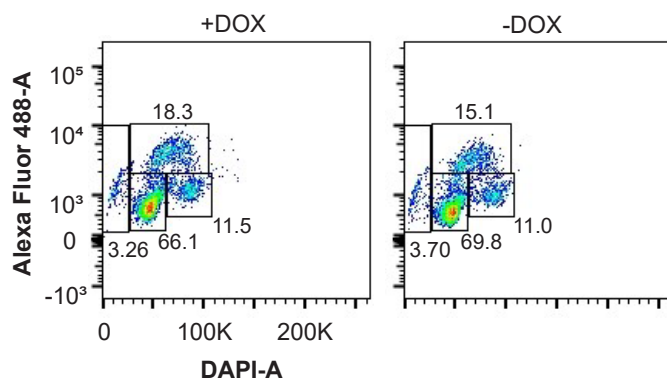

**Figure S2 Related to Figure 1: PSC-derived ESPCs exhibit basal cell characteristics. (A)**

Relative expression of the  $\Delta$ Np63 basal cell marker in ESPCs at passage 1, normalized to the expression in normal human skin keratinocytes (NHSK); n=2. Error bars represent SEM. **(B)** Cell cycle analysis of ESPCs in the presence or absence of 100 ng/mL DOX reveals no changes in proliferation in monolayer cells, as measured by EdU incorporation; n=2, one representative example is shown.

Figure S3 Related to Figure 3

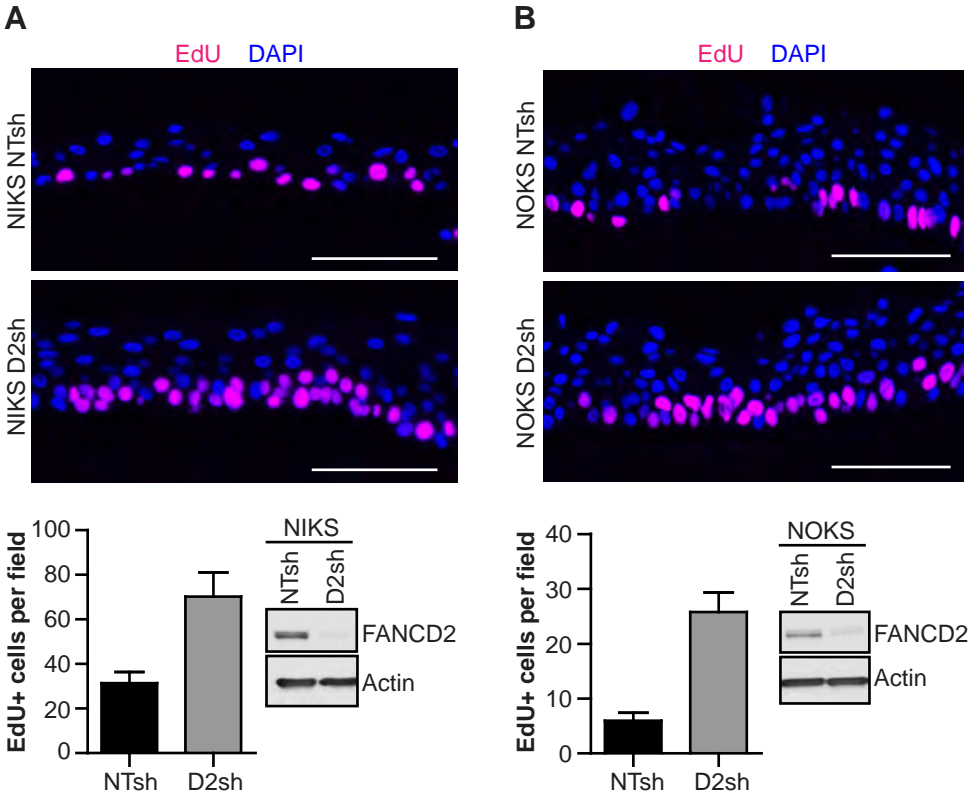

**Figure S3 Related to Figure 3: FA pathway loss stimulates proliferation in cutaneous and oral epidermis.** Quantification of EdU+ cells on 3D engineered epidermis derived from control NTsh or FANCD2 depleted NIKS (**A**) or NOKS (**B**); n=1. Bottom right insets confirm decreased protein expression of FANCD2 in the FANCD2-depleted NIKS (**A**) or NOKS (**B**). Error bars represent SEM. Scale, 50  $\mu$ m.

Figure S4 Related to Figure 4

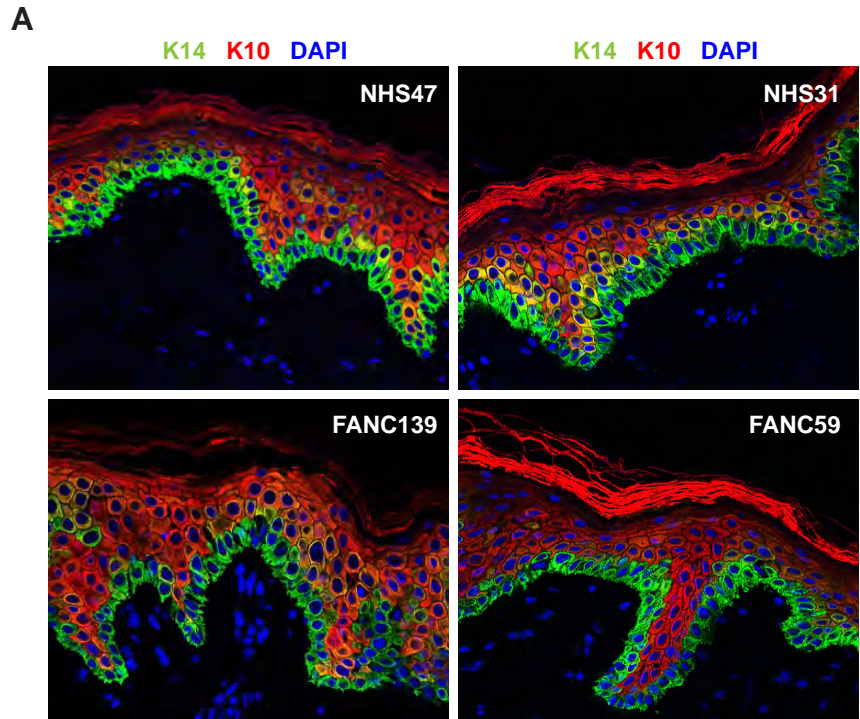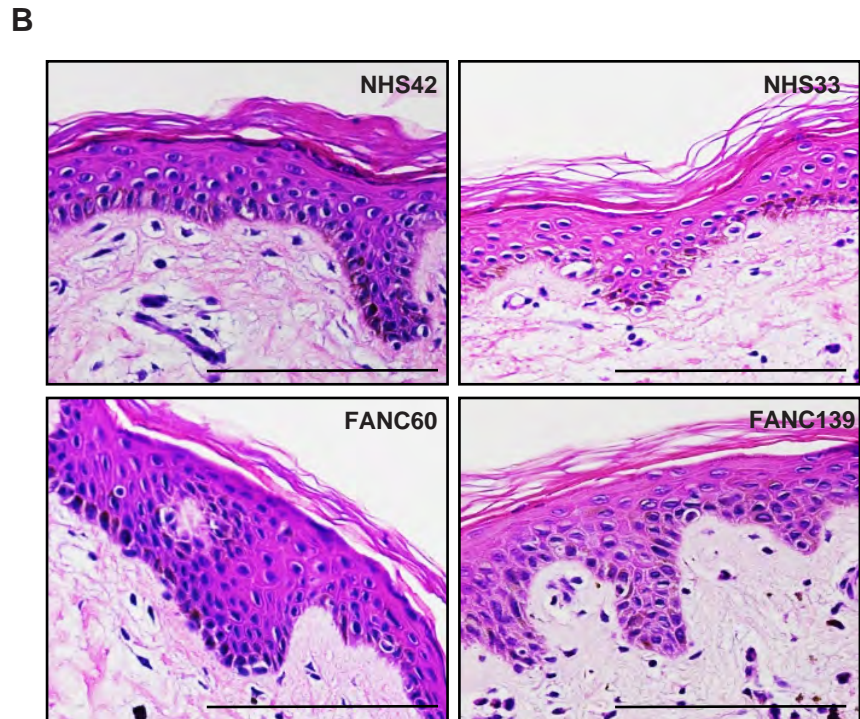

**Figure S4 Related to Figure 4: FA pathway loss does not impair epidermal differentiation.**

(A) Sections from skin punch biopsies of 2 controls (NHS) and 2 individuals with FA (FANC) were stained for the differentiation markers K14 and K10, and could not be distinguished from each other based on examination by a pathologist blinded to FA status. (B) Skin-punch biopsies from 2 affected individuals and 2 gender-matched controls, showing no differences in the overall architecture of FA epidermis. Scale bar, 100  $\mu$ m.



Figure S5 Related to Figure 5

**A**

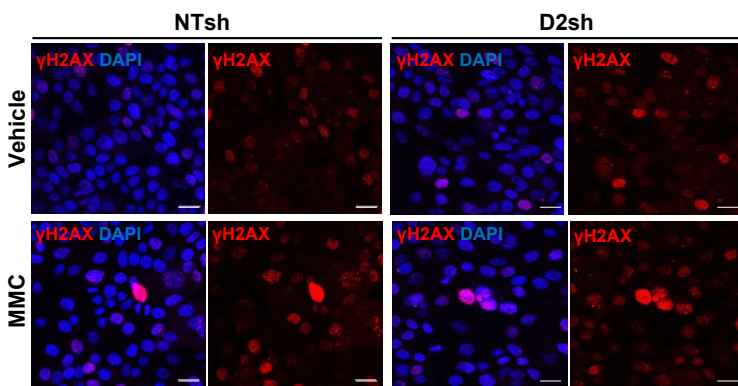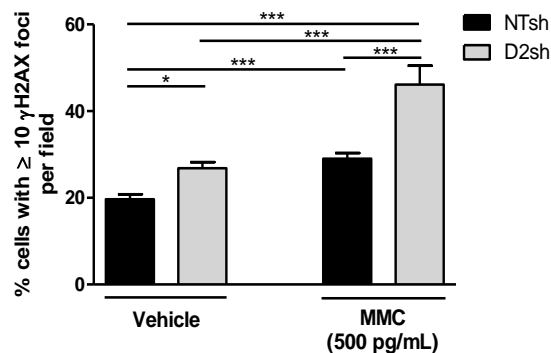

**B**

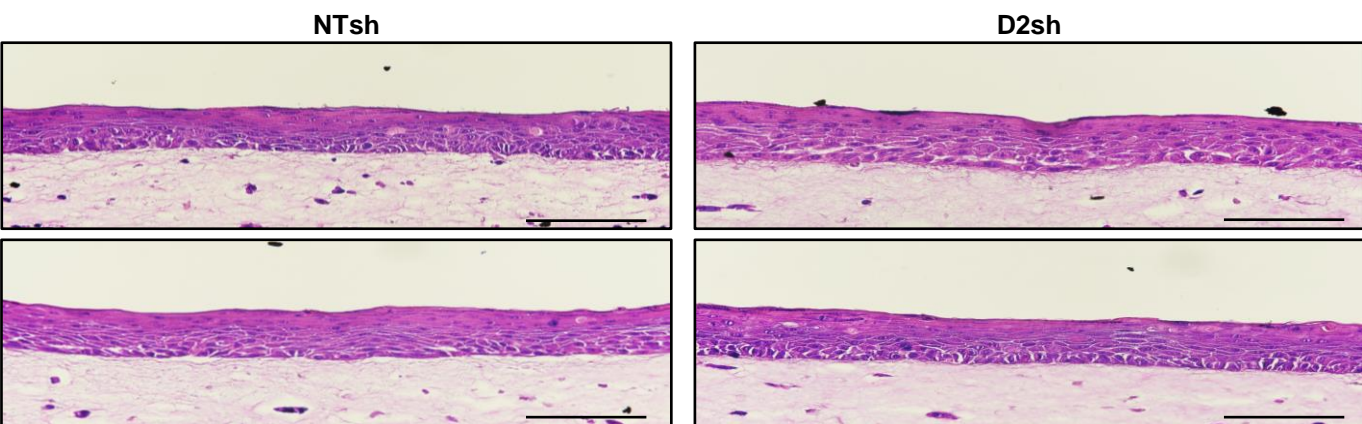

**C**

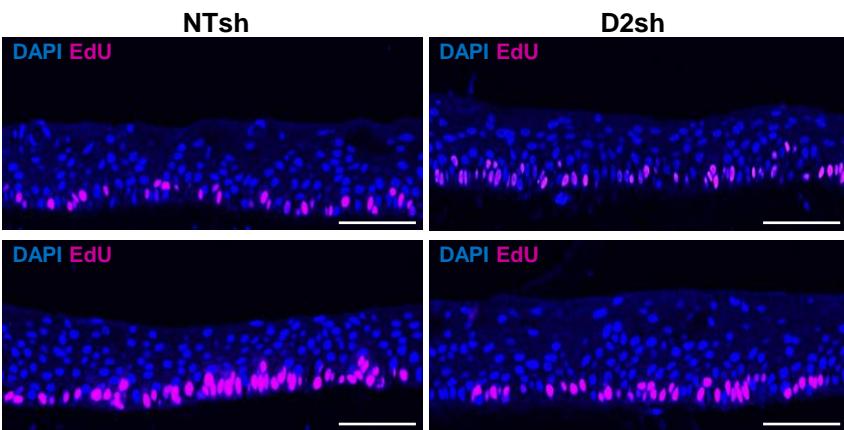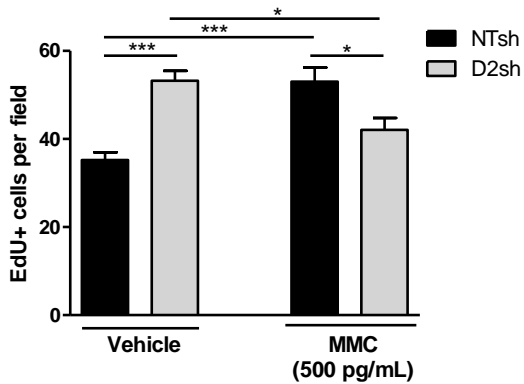

**D**

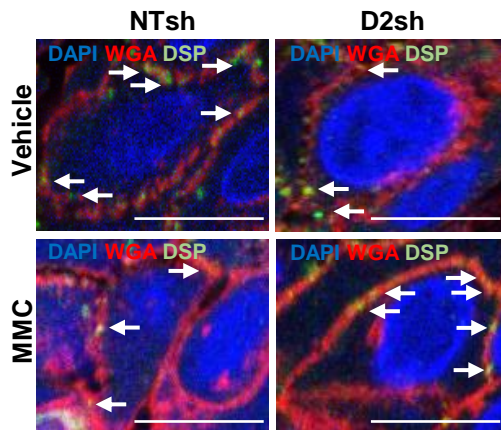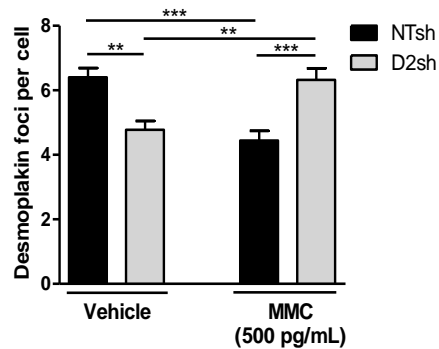

**Figure S5 Related to Figure 5: DNA damage mimics the functional defects of FA-EORs in normal epidermis.** (A) NTsh and FANCD2sh (D2sh) NIKS were pretreated with vehicle or a nontoxic dose of MMC (500 pg/mL) and stained for  $\gamma$ H2AX. Representative images and quantification of cells with  $\geq 10$   $\gamma$ H2AX foci are shown. At least 170  $\gamma$ H2AX+ cells were counted per condition. \* $P < 0.05$  and \*\*\* $P < 0.001$  (1-way ANOVA, n=1 biological replicate, n=4-10 fields). Error bars represent SEM. Scale bar, 20  $\mu$ m. (B) Representative images of H&E staining showing normal overall architecture on 3D engineered epidermis derived from NTsh and D2sh NIKS continuously treated with vehicle or MMC (500 pg/mL). Scale bar, 100  $\mu$ m. (C) Quantification of EdU+ cells in 3D engineered epidermis derived from NTsh and D2sh NIKS continuously treated with vehicle or MMC (500 pg/mL). \* $P < 0.05$  and \*\*\* $P < 0.001$  (1-way ANOVA, n=1 biological replicate, n=3 technical replicates). Error bars represent SEM. Scale bar, 100  $\mu$ m. (D) Sections from NTsh and D2sh NIKS continuously treated with vehicle or MMC (500 pg/mL) were stained for DSP 1/2 and the cell membrane marker wheat germ agglutinin (WGA). Images and quantification of DSP foci per cell are shown. Arrows: DSP foci on membrane. \*\* $P < 0.01$  and \*\*\* $P < 0.001$  (1-way ANOVA, n=1 biological replicate, n=2 technical replicates). Error bars represent SEM. Scale bar, 10  $\mu$ m.

**Table S1 Related to Table 1 and Figure S1: FA somatic mutations in sporadic cancers.**

| Gene         | Mutations in AML | Mutations in HN SCC                                                               | Mutations in Skin SCC                                                                                |
|--------------|------------------|-----------------------------------------------------------------------------------|------------------------------------------------------------------------------------------------------|
| FANCA        | -                | K143N, D533N, S394C                                                               | S645F, S113L, R1243K, S1149F, A1227T, K847N, P128S                                                   |
| FANCB        | -                | V301L, I76M, I418Nfs*18                                                           | P610L                                                                                                |
| FANCC        | E43G             | C10Y, E259*                                                                       | P360S                                                                                                |
| FANCD1/BRCA2 | -                | E2903K, V1605D, G500V, E1571K, I2105V, P606L, K3315N, E3342K, R2625*, X211_splice | A2595G, P2477L, P3292S, P3292L, P2153L, Q2160H, R2787H, P655R, C1960G, P2334S, L3011F, P555S, W2586* |
| FANCD2       | -                | Q1010R, S250T, X426_splice                                                        | F533C, S603C, S1145*                                                                                 |
| FANCE        | -                | -                                                                                 | A126V                                                                                                |
| FANCF        | -                | -                                                                                 | D105G                                                                                                |
| FANCG        | -                | S33C, D604N                                                                       | S425L                                                                                                |
| FANCI        | S1011T           | I741M, D802N, Q74E                                                                | I877L, F763=                                                                                         |
| FANCJ/BRIP1  | -                | S1115F, G750V, Q867L, W863L, T411A, D280N                                         | E81*                                                                                                 |
| FANCL        | -                | M305V                                                                             | P249L, P249S                                                                                         |
| FANCM        | G535S            | R185T, S832C, R92P, V1336Lfs*2                                                    | P962S, S1466L                                                                                        |
| FANCN/PALB2  | -                | D586N, N444S, S489F, C828F                                                        | L482F, R501K                                                                                         |
| FANCO/RAD51C | -                | P18R, 120Qfs*21                                                                   | -                                                                                                    |
| FANCP/SLX4   | -                | S1608L, E1780K, L193F, P1477S, S659L                                              | -                                                                                                    |
| FANCQ/ERCC4  | -                | R138K, E694Q, D287N, P550S                                                        | S283F, P550S, E549K                                                                                  |
| FANCR/RAD51  | -                | S296L                                                                             | -                                                                                                    |
| FANCS/BRCA1  | -                | D853N, G1492R, E230Q, D1505N, R664G, R1645M, S1241F, H816Y, X101_splice           | P985L, L1439F, P1192L, P1192S                                                                        |
| FANCT/UBE2T  | -                | -                                                                                 | -                                                                                                    |
| FANCU/XRCC2  | -                | -                                                                                 | -                                                                                                    |
| FANCV/MAD2L2 | -                | Y119F, E106*                                                                      | -                                                                                                    |
| FANCW/RFWD3  | -                | Q19L, E709K, A17V                                                                 | -                                                                                                    |

**Table S1 Related to Table 1 and Figure S1: FA somatic mutations in sporadic cancers.** List of FA non-synonymous mutations in AML, HN SCC, and skin SCC obtained from TCGA data.

**Table S2 Related to Figure 4: Characteristics of skin biopsy donors used for pigment incontinence studies.**

| <b>Donor</b> | <b>Gender</b> | <b>Age (years)</b> | <b>Race</b>      |
|--------------|---------------|--------------------|------------------|
| NHS66        | M             | 26                 | Not Reported     |
| NHS64        | F             | 37                 | Caucasian        |
| NHS47        | M             | 20                 | African-American |
| NHS42        | F             | 28                 | Caucasian        |
| NHS39        | F             | 24                 | Not Reported     |
| NHS38        | M             | 20                 | Caucasian        |
| NHS33        | F             | 28                 | Caucasian        |
| NHS31        | F             | 24                 | Not Reported     |
| NHS30        | M             | 21                 | Not Reported     |
| FANC144      | F             | 16                 | Caucasian        |
| FANC139      | F             | 23                 | Caucasian        |
| FANC92       | M             | 13                 | Caucasian        |
| FANC89       | F             | 20                 | Caucasian        |
| FANC65       | M             | 4                  | Caucasian        |
| FANC60       | F             | 19                 | Caucasian        |
| FANC59       | F             | 18                 | Caucasian        |
| FANC51       | M             | 19                 | African-American |
| FANC40       | F             | 3                  | Caucasian        |

**Table S2 Related to Figure 4: Characteristics of skin biopsy donors used for pigment incontinence studies.** Table showing the characteristics for individuals with FA (FANC) and gender-matched control (NHS) donors that provided skin-punch biopsies for the pigment incontinence experiments. Abbreviations: NHS= gender-matched normal human skin donor; FANC= clinically diagnosed FA donor; M=Male; F=Female.

**Table S3 Related to Figure 4: Characteristics of skin biopsy donors used for EM analyses.**

| <b>Donor</b> | <b>Gender</b> | <b>Age (years)</b> |
|--------------|---------------|--------------------|
| NHS57        | F             | 21                 |
| NHS58        | M             | 23                 |
| NHS59        | F             | 33                 |
| NHS60        | M             | 20                 |
| NHS62        | F             | 30                 |
| NHS63        | M             | 35                 |
| FANC116      | F             | 34                 |
| FANC131      | M             | 5                  |
| FANC132      | M             | 6                  |
| FANC134      | M             | 17                 |
| FANC135      | M             | 2                  |
| FANC136      | M             | 3                  |
| FANC138      | F             | 15                 |
| FANC139      | F             | 23                 |
| FANC140      | F             | 25                 |

**Table S3 Related to Figure 4: Characteristics of skin biopsy donors used for EM analyses.**

Table showing the characteristics for individuals with FA (FANC) and gender-matched control (NHS) donors that provided skin-punch biopsies for EM analyses. Abbreviations: NHS= gender-matched normal human skin donor; FANC= clinically diagnosed FA donor; M=Male; F=Female.



**Table S4: List of antibodies used for IF and WB analyses. Related to STAR Methods.**

| <b>Antibody</b>                                          | <b>Company</b>           | <b>Cat. Number</b> | <b>Dilution</b>        |
|----------------------------------------------------------|--------------------------|--------------------|------------------------|
| Rabbit anti-Krt14                                        | BioLegend                | 905301             | 1:2,000                |
| Mouse anti-phospho-Histone H2A.X Ser139                  | Millipore                | 05-636             | 1:400                  |
| Mouse anti-cytokeratin 10                                | Abcam                    | ab9025             | 1:250                  |
| Rabbit anti-FANCD2                                       | Novus                    | NB100-182          | 1:400 IF<br>1:2,000 WB |
| Mouse anti-Vinculin                                      | Sigma-Aldrich            | V9131              | 1:5,000                |
| Rabbit anti-FANCA                                        | Cascade BioScience       | ABP-6201           | 1:1,000                |
| Wheat Germ Agglutinin,<br>tetramethylrhodamine conjugate | Thermo Fisher Scientific | W849               | 1:10                   |
| Mouse anti-Desmoplakin 1/2, clone DP447,<br>supernatant  | Progen Biotechnik        | 651155             | 1:10                   |
| Donkey anti-rabbit IgG HRP-conjugated                    | GE Healthcare            | NA934              | 1:5,000                |
| Sheep anti-mouse IgG HRP-conjugated                      | GE Healthcare            | NA931              | 1:2,500                |
| AlexaFluor Goat anti-rabbit 488                          | Thermo Fisher Scientific | A-11008            | 1:500                  |
| AlexaFluor Goat anti-mouse 568                           | Thermo Fisher Scientific | A-11004            | 1:500                  |

**Table S5: List of primers used for RT-qPCR analyses. Related to STAR Methods.**

| <b>Gene</b>   | <b>Specie</b> | <b>Strand</b> | <b>Sequence</b>           |
|---------------|---------------|---------------|---------------------------|
| <i>ΔNp63</i>  | Human         | Forward       | ATTGTAAGGGTCTCGGGGTGGG    |
|               |               | Reverse       | GAGTCTGGGCATTGTTTTCCAGGT  |
| <i>GAPDH</i>  | Human         | Forward       | GGTCTCCTCTGACTTCAACA      |
|               |               | Reverse       | ATACCAGGAAATGAGCTTGA      |
| <i>NOTCH1</i> | Human         | Forward       | TGAATGGCGGGAAGTGTGAAG     |
|               |               | Reverse       | CATTGTCCAGGGGTGTCAGG      |
| <i>VWCE</i>   | Human         | Forward       | GTGTAGATGTAAACGAGTGTCCG   |
|               |               | Reverse       | GTCGGCATGTGCATAGGAAG      |
| <i>PLXNB3</i> | Human         | Forward       | TACGGGTGTCGGACAATGTG      |
|               |               | Reverse       | CATCTGCTTGTAGCGTGGGA      |
| <i>LGALS4</i> | Human         | Forward       | CGACGCTGCCTTACTACCAG      |
|               |               | Reverse       | CCAACCACAAAGTTCACGAAGA    |
| <i>CLDN9</i>  | Human         | Forward       | AGACACACCCTCTGAGTCACCTAGG |
|               |               | Reverse       | ACGATGCTGTTGCCGATGAAG     |
| <i>PCDHB6</i> | Human         | Forward       | AACGGCCTTCAGAGGTACAC      |
|               |               | Reverse       | CCAACGGTTTGTCTAGCACCA     |
